# Supplementary material for: Impact of Soil Biodisinfection Techniques in Horticultural Crops on Profitability within the Framework of the Circular Economy
Source: MDPI journal article supplement (doi:10.3390/horticulturae9080859), 2023-07-27
Supplement: s1 [file s1]

**Table S1.** Specific production techniques used in each plant species and type of production cycle.

| Title 1          | Conventional production (C)                                 |                                                             |                                                        |                                                                                                                      | Production with biodisinfection (A)                         |                                                             |                                                           |                                                                                                                      |
|------------------|-------------------------------------------------------------|-------------------------------------------------------------|--------------------------------------------------------|----------------------------------------------------------------------------------------------------------------------|-------------------------------------------------------------|-------------------------------------------------------------|-----------------------------------------------------------|----------------------------------------------------------------------------------------------------------------------|
|                  | Long-cycle tomato                                           | Short-cycle tomato                                          | Short-cycle pepper                                     | Water-melon                                                                                                          | Long-cycle to-mato                                          | Short-cycle tomato                                          | Short-cycle pepper                                        | Watermelon                                                                                                           |
| Seedling raising | In seedbed for 33 days in trays of 150 cells                | In seedbed for 33 days in trays of 150 cells                | In seedbed for 40 days in trays of 96 cells            | In seedbed for 40 days in trays of 40 cells                                                                          | In seedbed for 33 days in trays of 150 cells                | In seedbed for 33 days in trays of 150 cells                | In seedbed for 40 days in trays of 96 cells               | In seedbed for 40 days in trays of 40 cells                                                                          |
| Planting density | 16,000 plants/ha                                            | 16,000 plants/ha                                            | 20,000 plants/ha                                       | 2,500 plants/ha                                                                                                      | 16,000 plants/ha                                            | 16,000 plants/ha                                            | 20,000 plants/ha                                          | 2,500 plants/ha                                                                                                      |
| Vegetal material | Adapted to the conditions of the farm without grafting      | Adapted to the conditions of the farm without grafting      | Adapted to the conditions of the farm without grafting | Adapted to the conditions of the farm, grafted on a rootstock of <i>Cucurbita maxima</i> x <i>Cucurbita moschata</i> | Adapted to the conditions of the farm without grafting      | Adapted to the conditions of the farm without grafting      | Adaptado a las condiciones de la explotación sin injertar | Adapted to the conditions of the farm, grafted on a rootstock of <i>Cucurbita maxima</i> x <i>Cucurbita moschata</i> |
| Labor            | Manual for each cultivation task                            |                                                             |                                                        |                                                                                                                      |                                                             |                                                             |                                                           |                                                                                                                      |
| Pollination      | Forced with bumblebees (5 hives/ha). Renewal every 2 months | Forced with bumblebees (5 hives/ha). Renewal every 2 months | With air                                               | Forced with bees (4 hives/ha)                                                                                        | Forced with bumblebees (5 hives/ha). Renewal every 2 months | Forced with bumblebees (5 hives/ha). Renewal every 2 months | With air                                                  | Forced with bees (4 hives/ha)                                                                                        |
| Pruning          | Single-arm, pinching the secondary shoots. Clamping of      | Single-arm, pinching the secondary shoots. Clamping of      | Cleaning of internal sprouting                         | -                                                                                                                    | Single-arm, pinching the secondary                          | Single-arm, pinching the secondary shoots. Clamping of      | Cleaning of internal sprouting                            | -                                                                                                                    |



|                   |                                                                                                                                                                               |                                                                                                                                             |                                                                                                                                                |
|-------------------|-------------------------------------------------------------------------------------------------------------------------------------------------------------------------------|---------------------------------------------------------------------------------------------------------------------------------------------|------------------------------------------------------------------------------------------------------------------------------------------------|
| Greenhouse        | Greenhouse of the "raspa y amagado" type, with a height of 6.0, 5.0, and 4.7 m at the ridge, under the canal, and in the trellis, respectively                                | Greenhouse of the "raspa y amagado" type, with a height of 4.5, 3.5, and 3.0 at the ridge, under the canal and in the trellis, respectively | Greenhouse of the "raspa y amagado" type, with a height of 6.0, 5.0, and 4.7 m at the ridge, under the canal, and in the trellis, respectively |
| Irrigation system | High-frequency irrigation system composed of an irrigation programmer, which incorporates five tanks for the preparation of nutrient solutions applied to the different crops |                                                                                                                                             |                                                                                                                                                |
